# Supplementary material for: Effect of solvent isomers on the gelation properties of tri-aryl amine organogels and their hybrid thermoreversible gels with poly[vinyl chloride]
Source: Royal Society of Chemistry journal article supplement (doi:10.1039/d2sm00563h), 2022-01-01
Supplement: d2sm00563h1.pdf [file d2sm00563h1.pdf]

**EFFECT OF SOLVENT ISOMER ON THE GELATION PROPERTIES  
OF TRI-ARYL AMINE ORGANOGELS AND THEIR HYBRID  
THERMOREVERSIBLE GELS WITH POLY[VINYL CHLORIDE].**

**SUPPLEMENTARY INFORMATION**

YAO, Xiao; COLLIN, Dominique; GAVAT, Odile; CARVALHO, Alain; MOULIN, Emilie ;  
GIUSEPPONE, Nicolas; GUENET, Jean-Michel.\*

Institut Charles Sadron  
CNRS-Université de Strasbourg  
23 rue du Loess, BP84047  
67034 STRASBOURG, Cedex2, France

**Corresponding author:** Jean-Michel GUENET [jean-michel.guenet@ics-cnrs.unistra.fr](mailto:jean-michel.guenet@ics-cnrs.unistra.fr)

**Keywords :** hybrid materials, PVC, thermoreversible gels, organogels, arylamines, solvent  
type

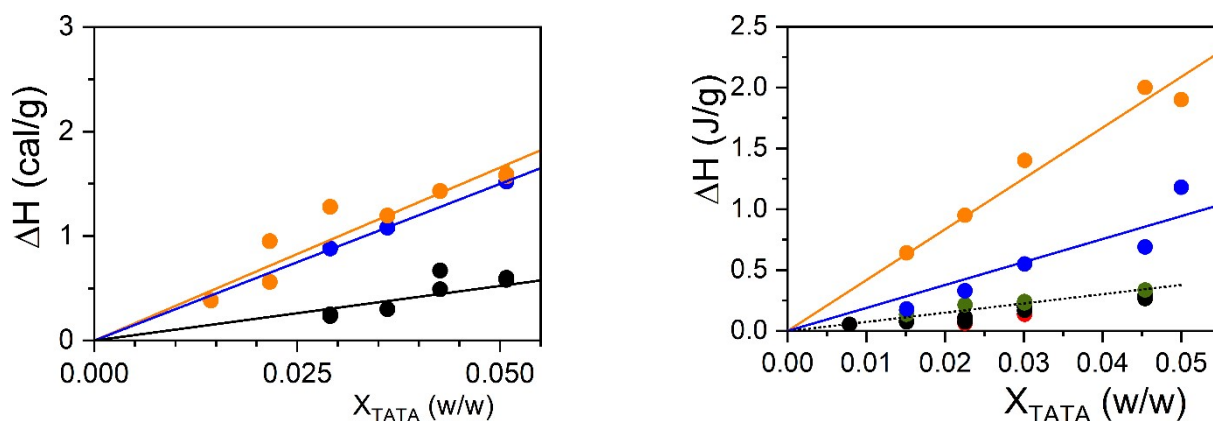

**Figure S1:** enthalpies of the different events in TATA/DCB gels. *left:* TATA/mDCB, ● for  $T = 51^\circ\text{C}$ , ● for  $T = 109^\circ\text{C}$ , ● for terminal melting. *Right:* TATA/oDCB, ● for  $T = 16^\circ\text{C}$ , ● for  $T = 37^\circ\text{C}$ , ● for  $T = 61^\circ\text{C}$ , ● for  $T = 85^\circ\text{C}$ , ● for terminal melting.

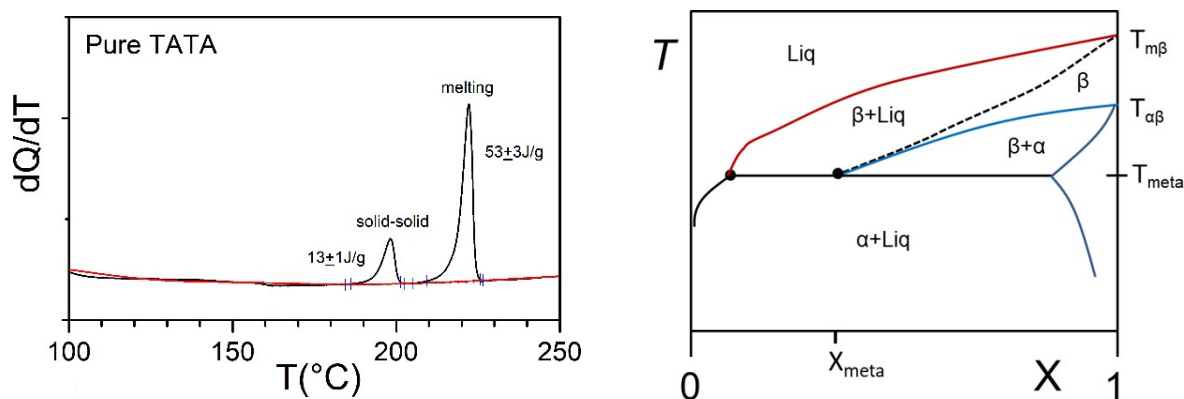

**Figure S2:** *left,* DSC endotherm showing the existence of a solid-solid transformation related to the existence of two crystalline structure in solid TATA. *Right:* a theoretical phase diagram presenting a metatectic transformation due to the existence of two crystal structures  $\alpha$  and  $\beta$ .

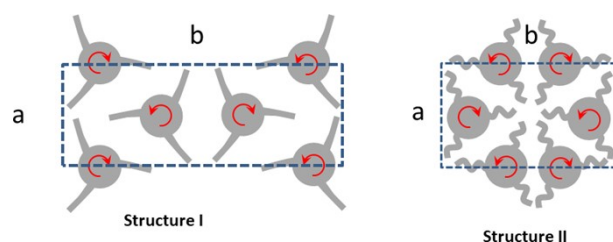

**Figure S3:** structures in the solid state for: *left:* after crystallization from a mixture of solvents, *right* at  $200^\circ\text{C}$  after the solid-solid transition seen in figure S2 left (ref. 15).

| component                                | TATA  | o-DCBH | o-DCBD | PVC   |
|------------------------------------------|-------|--------|--------|-------|
| $A = \sum b_i \times 10^{12} \text{ cm}$ | 8     | 4.4    | 8.59   | 1.17  |
| $A/v_m$                                  | 0.011 | 0.039  | 0.077  | 0.030 |
| $Z_e/v_m$                                | 0.583 | 0.68   | 0.68   | 0.71  |

**Table ST1:** Scattering amplitudes<sup>34</sup> of the different components used in the present study obtained by summing the scattering length ( $b_i$ ) of the constituting atoms, together with the amplitude per unit molar volume ( $v_m$ ), and the number of electrons ( $Z_e$ ) per unit molar volume. The latter allows comparison between the different radiations and components.

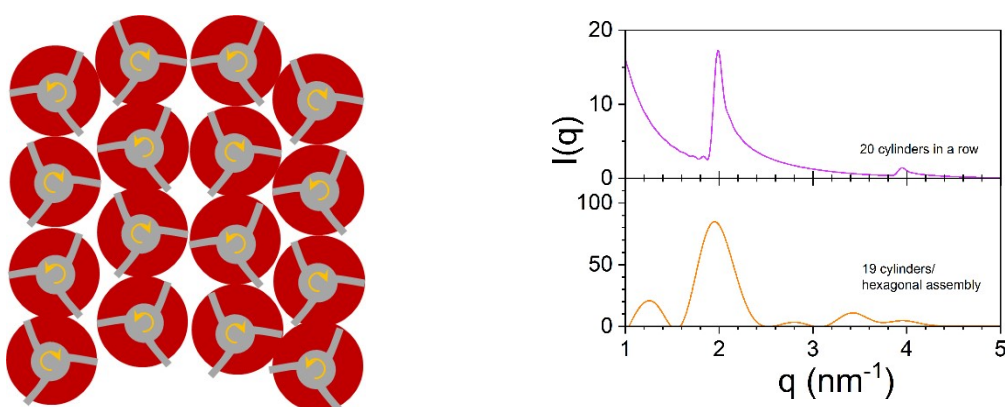

**Figure S4:** A tentative model for the molecular compound (left) based on recent calculations indicating that the helical structures may arrange in rows<sup>15</sup>. Right: calculation performed with equation 3 for helices arranged in rows, or in hexagonal packing.

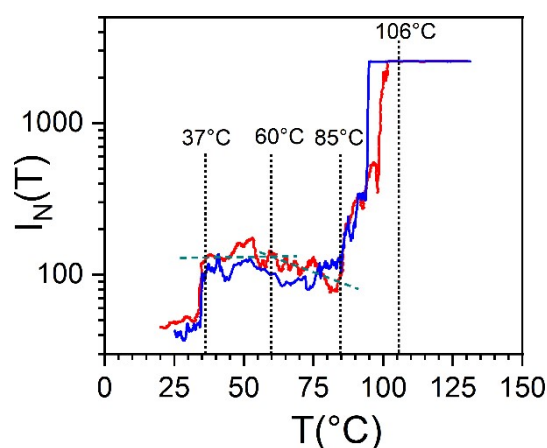

**Figure S5:** Turbidity determination for TATA/oDCB. The optical setup allows measurement of the light intensity attenuation by means of a collimated monochromatic laser beam ( $\lambda = 632.8 \text{ nm}$ ) shined onto a 5 mm-thick cuvette containing the sample. The transmitted light is collected onto a CCD camera. The samples are heated (red curve) at  $130^\circ\text{C}$  and then cooled (blue curve) to room temperature at a rate of about  $1.4\text{--}1.5^\circ\text{C/min}$ . A slight increase of transmission is seen at  $37^\circ\text{C}$  corresponding to the  $C2 \Rightarrow C3$  transformation. The other transformation are also indicated by dotted lines,  $T + 106^\circ\text{C}$  being the terminal melting.

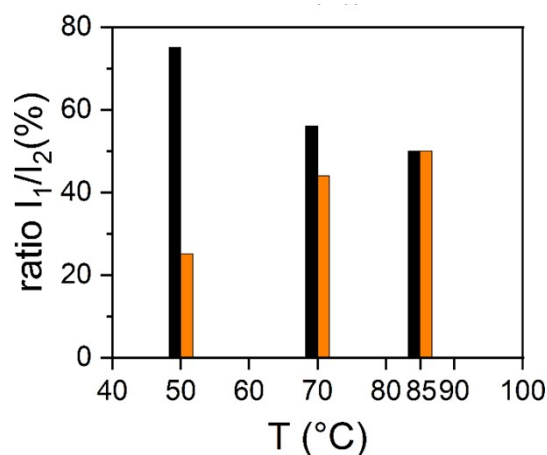

**Figure S6:** ratio of the intensities  $I_1/I_2$  of peaks at  $q = 3.439 \text{ nm}^{-1}$  (black) vs peak at  $q = 3.704 \text{ nm}^{-1}$  (orange) at different temperatures (x axis) from figure 3 upper right. The relative intensities have been calculated by taking the peak surface once fitted by a Lorentzian function.

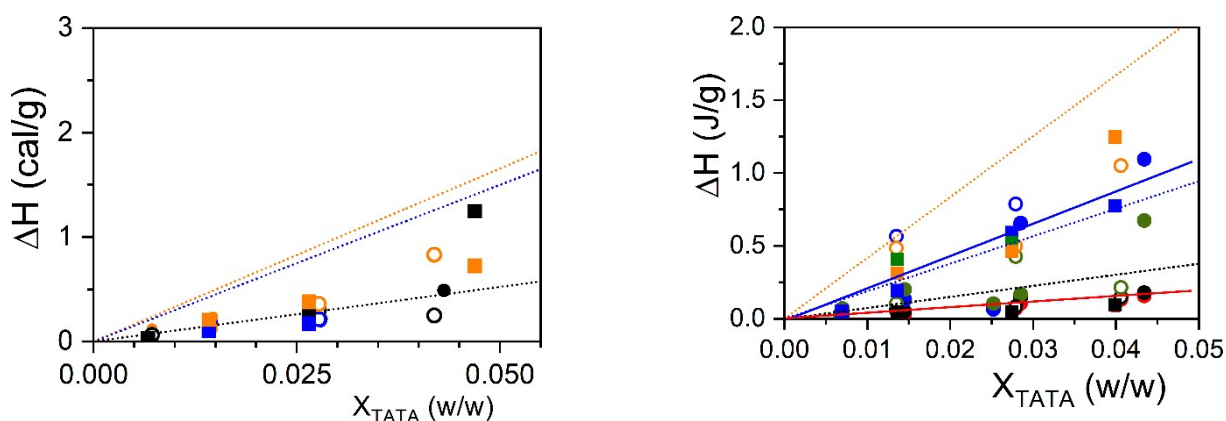

**Figure S7:** enthalpies of the different events in TATA/DCB gels. *left:* TATA/PVC/*m*DCB, PVC5% ● for  $T = 51^\circ\text{C}$ , ● for  $T = 109^\circ\text{C}$ , ● for terminal melting; PVC10% ● for  $T = 51^\circ\text{C}$ , ● for  $T = 109^\circ\text{C}$ , ● for terminal melting; PVC15% ■ for  $T = 51^\circ\text{C}$ , ■ for  $T = 109^\circ\text{C}$ , ■ for terminal melting. *Right:* TATA/PVC/*o*DCB, PVC5%, ● for  $T = 16^\circ\text{C}$ , ● for  $T = 37^\circ\text{C}$ , ● for  $T = 61^\circ\text{C}$ , ● for  $T = 85^\circ\text{C}$ , ● for terminal melting; PVC10%, ● for  $T = 16^\circ\text{C}$ , ● for  $T = 37^\circ\text{C}$ , ● for  $T = 61^\circ\text{C}$ , ● for  $T = 85^\circ\text{C}$ , ● for terminal melting; PVC15%, ■ for  $T = 16^\circ\text{C}$ , ■ for  $T = 37^\circ\text{C}$ , ■ for  $T = 61^\circ\text{C}$ , ■ for  $T = 85^\circ\text{C}$ , ■ for terminal melting.
